# Supplementary material for: How to Make the Hospital an Option Again: Midwives’ and Obstetricians’ Experiences with a Designated Clinic for Women Who Request Different Care than Recommended in the Guidelines
Source: MDPI journal article supplement (doi:10.3390/ijerph182111627), 2021-11-05
Supplement: s1 [file s1]

**Table S1.** Characteristics of the participants (n=10).

| Characteristic                           |   | Role in care process                         | The client's initial request                                                                             |
|------------------------------------------|---|----------------------------------------------|----------------------------------------------------------------------------------------------------------|
| Women, (n)                               | 7 |                                              |                                                                                                          |
| Men, (n)                                 | 3 |                                              |                                                                                                          |
| Age (yrs)                                |   |                                              |                                                                                                          |
| <30                                      | 0 |                                              |                                                                                                          |
| 31-40                                    | 5 |                                              |                                                                                                          |
| 41-50                                    | 2 |                                              |                                                                                                          |
| 51-60                                    | 3 |                                              |                                                                                                          |
| >60                                      | 0 |                                              |                                                                                                          |
| Profession, (n)                          |   |                                              |                                                                                                          |
| Community midwife                        |   |                                              |                                                                                                          |
| 1                                        |   | Referral to the clinic                       | Midwife-led VBAC                                                                                         |
| 2                                        |   | Referral to the clinic                       | Midwife-led VBAC                                                                                         |
| 3                                        |   | Referral to the clinic                       | Midwife-led VBAC                                                                                         |
| Caseload midwife                         |   |                                              |                                                                                                          |
| 1                                        |   | Referral to the clinic                       | Midwife-led VBAC                                                                                         |
| 2                                        |   | Referral to the clinic                       | Midwife-led VBAC                                                                                         |
| Hospital-based midwife                   |   | Intrapartum care                             | Waterbirth VBAC                                                                                          |
| Obstetrician (working within the clinic) |   |                                              |                                                                                                          |
| Obs. 1                                   |   | Decision-making process and intrapartum care | Twin birth (vaginal), request: no vaginal examinations, no IV-access, No foetal monitoring during birth. |
| Obs. 2                                   |   | Decision-making process and intrapartum care | Midwife-led VBAC                                                                                         |

---

**Obstetrician (working with  
the clinic)**

**Obs. 3**

Intrapartum care

Midwife-led VBAC

**Obs. 4**

Intrapartum care

Midwife-led VBAC

**Work experience (yrs)**

**1-5**

1

**6-10**

5

**10-20**

1

**>20**

3

---

**Table S2.** Topics addressed in the interviews.

|                                                                                                                                                                                                                                                                                                                                                                                                                                                                                                                                                                                                                                                                                                                                                                                                                                                                                                                                                                                                                                                                                                                                                                                                                                                                                                                                                                                                                                                                                                                                   |
|-----------------------------------------------------------------------------------------------------------------------------------------------------------------------------------------------------------------------------------------------------------------------------------------------------------------------------------------------------------------------------------------------------------------------------------------------------------------------------------------------------------------------------------------------------------------------------------------------------------------------------------------------------------------------------------------------------------------------------------------------------------------------------------------------------------------------------------------------------------------------------------------------------------------------------------------------------------------------------------------------------------------------------------------------------------------------------------------------------------------------------------------------------------------------------------------------------------------------------------------------------------------------------------------------------------------------------------------------------------------------------------------------------------------------------------------------------------------------------------------------------------------------------------|
| <ul style="list-style-type: none"> <li>• <b>Experience with working outside the guidelines:</b><br/> General introduction of the specific case<br/> The client's request(s) and care provider's thoughts, opinions and feelings about it<br/> Participants' reaction to the request(s)<br/> The initial medical recommendation<br/> The decision-making process at the clinic and the care provider's role in this<br/> The participant's agreement and satisfaction with this process<br/> Flexibility on both sides<br/> Discussion of medical advice, risks and interventions with client<br/> Role of the birth plan<br/> Relationship with the client<br/> Trust and how to obtain it<br/> How was the communication between care provider and client?<br/> Mutual expectations<br/> The collaboration with other professionals at the clinic<br/> How do you look back on this specific case?</li> <li>• <b>Your opinion about the outpatient clinic</b><br/> What are its strengths?<br/> What could be done better?</li> <li>• <b>Values and vision on maternity care</b><br/> Trust: what does trust mean to you and how do you achieve it?<br/> What is a good birth?<br/> Meaning of personal care<br/> How to tailor care?<br/> What is good communication? What is bad communication?</li> <li>• <b>Concerns, barriers and fears</b></li> <li>• <b>How do you perceive risks?</b></li> <li>• <b>Guidelines</b></li> <li>• <b>Shared Decision Making</b><br/> What do you think of Shared Decision Making?</li> </ul> |
|-----------------------------------------------------------------------------------------------------------------------------------------------------------------------------------------------------------------------------------------------------------------------------------------------------------------------------------------------------------------------------------------------------------------------------------------------------------------------------------------------------------------------------------------------------------------------------------------------------------------------------------------------------------------------------------------------------------------------------------------------------------------------------------------------------------------------------------------------------------------------------------------------------------------------------------------------------------------------------------------------------------------------------------------------------------------------------------------------------------------------------------------------------------------------------------------------------------------------------------------------------------------------------------------------------------------------------------------------------------------------------------------------------------------------------------------------------------------------------------------------------------------------------------|

**Table S3.** Characteristics of the ten cases.

| Participant: woman's medical indication   | G/P<br>Age<br>Gestational age | The woman's request/refusal                                                                                                                                                 | The birth plan after negotiation                                                                                                                                                                                                                           | Outcomes |
|-------------------------------------------|-------------------------------|-----------------------------------------------------------------------------------------------------------------------------------------------------------------------------|------------------------------------------------------------------------------------------------------------------------------------------------------------------------------------------------------------------------------------------------------------|----------|
| <b>Obs. 1: twin pregnancy</b>             |                               | Vaginal birth: no vaginal examinations, no intravenous-access (IV-access), no continuous intrapartum foetal heart monitoring, no medication postpartum. Birth on All-Fours. | No intravenous-access (IV-access), no continuous electronic foetal monitoring.<br>No active management after twin one and postpartum: interventions only if complications arise<br>Ultrasound examination after birth of first twin<br>Birth on All-Fours. |          |
| <b>Obs. 2: previous caesarean section</b> |                               | Vaginal birth: midwife-led continuity of carer in the hospital                                                                                                              | Hospital birth led by a community midwife<br>Shared Care between community midwife and obstetrician<br>Continuous electronic foetal monitoring                                                                                                             |          |
| <b>Obs. 3: previous caesarean section</b> |                               | Vaginal birth: midwife-led continuity of carer in the hospital                                                                                                              | Hospital birth led by a community midwife<br>Shared Care between community midwife and obstetrician<br>Intermittent foetal heart auscultation                                                                                                              |          |

**Obs. 4: previous  
caesarean section**

Vaginal birth: midwife-led continuity of carer in the  
hospital  
Interventions only if complications arise

Hospital birth led by a  
community midwife  
Shared Care between  
community midwife and  
obstetrician  
Interventions only if  
complications arise

**Community midwife 1:  
previous caesarean  
section**

Vaginal birth: midwife-led continuity of carer in the  
hospital  
No continuous intrapartum foetal heart monitoring

Hospital birth led by a  
community midwife  
Shared Care between  
community midwife and  
obstetrician  
Intermittent foetal heart  
auscultation

**Community midwife 2:  
previous caesarean  
section**

Vaginal birth: midwife-led continuity of carer in the  
hospital

Hospital birth led by a  
community midwife  
Shared Care between  
community midwife and  
obstetrician  
Continuous electronic foetal  
monitoring

**Community midwife 3:  
previous caesarean  
section and previous  
post-partum  
haemorrhage**

Midwife-led homebirth  
No vaginal examinations  
No IV-access

Hospital birth led by a  
community midwife  
Shared Care between  
community midwife and  
obstetrician  
Intermittent foetal heart  
auscultation  
No IV-access

|                                                                     |                                                                                                             |                                                                                                                                                                                                                                                                 |
|---------------------------------------------------------------------|-------------------------------------------------------------------------------------------------------------|-----------------------------------------------------------------------------------------------------------------------------------------------------------------------------------------------------------------------------------------------------------------|
| <b>Caseload midwife 1:<br/>previous caesarean<br/>section</b>       | Midwife-led homebirth                                                                                       | Hospital birth led by a<br>community midwife<br>Shared Care between<br>community midwife and<br>obstetrician<br>Continuous electronic foetal<br>monitoring                                                                                                      |
| <b>Caseload midwife 2:<br/>previous caesarean<br/>section</b>       | Vaginal birth: midwife-led continuity of carer in the<br>hospital                                           | Hospital birth led by a<br>community midwife<br>Shared Care between<br>community midwife and<br>obstetrician<br>Continuous electronic foetal<br>monitoring                                                                                                      |
| <b>Hospital-based midwife<br/>1: previous caesarean<br/>section</b> | Water birth<br>No vaginal examinations, no IV-access<br>A hands-off birth<br>No active management of labour | Obstetrician-led care in the<br>hospital<br>VBAC, water birth<br>No vaginal examinations, no<br>IV-access<br>Hands-off birth<br>Continuous electronic foetal<br>monitoring<br>No active management of<br>labour<br>Interventions only if<br>complications arise |

---
